# Supplementary material
Source: HighWire-hosted journal article supplement (https://bmjopen.bmj.com/content/14/10/e083507)

Supplemental file 2. Screenshots of the I-BA interventions

1. Left: Psychoeducational video on depression. Right: Activity diary used throughout treatment.

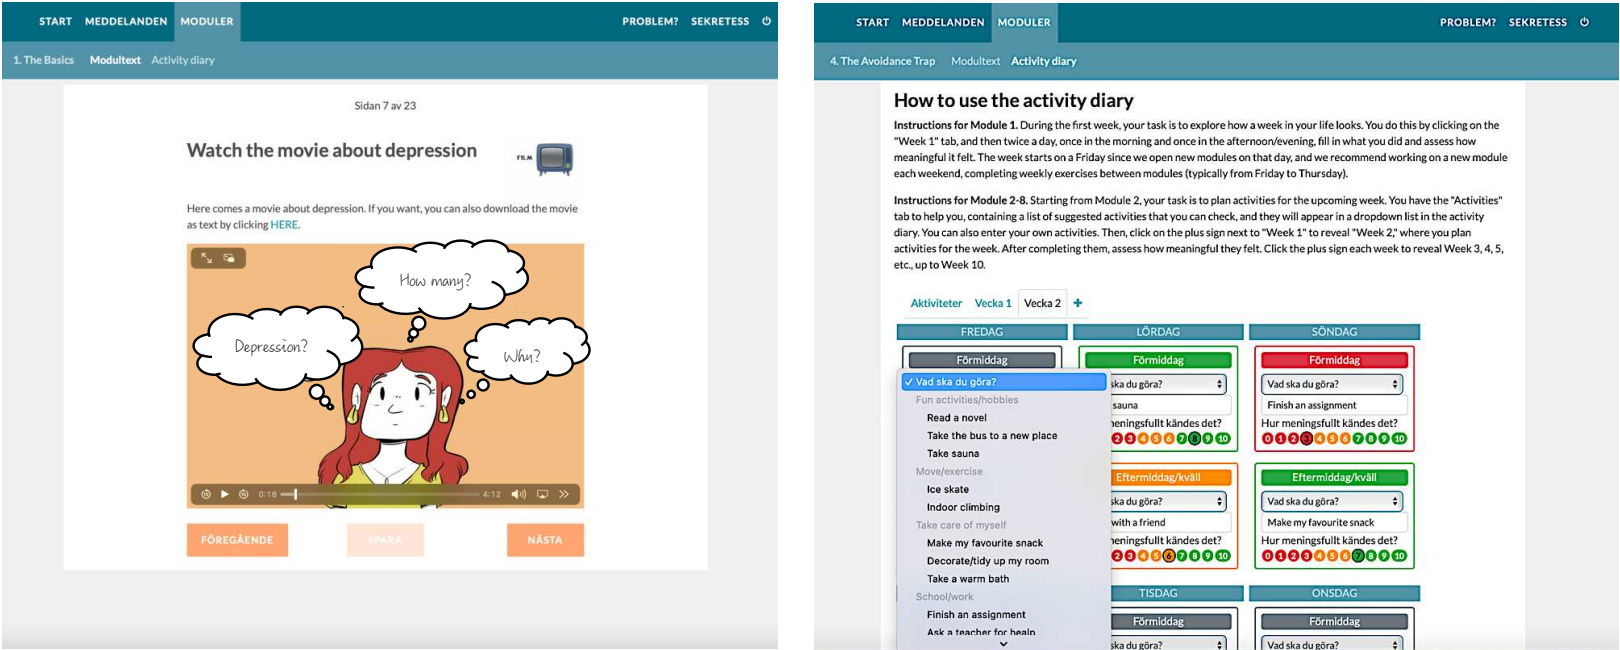

2. Left: The three fictional characters sharing their treatment goals. Right: Exercise on the avoidance trap.

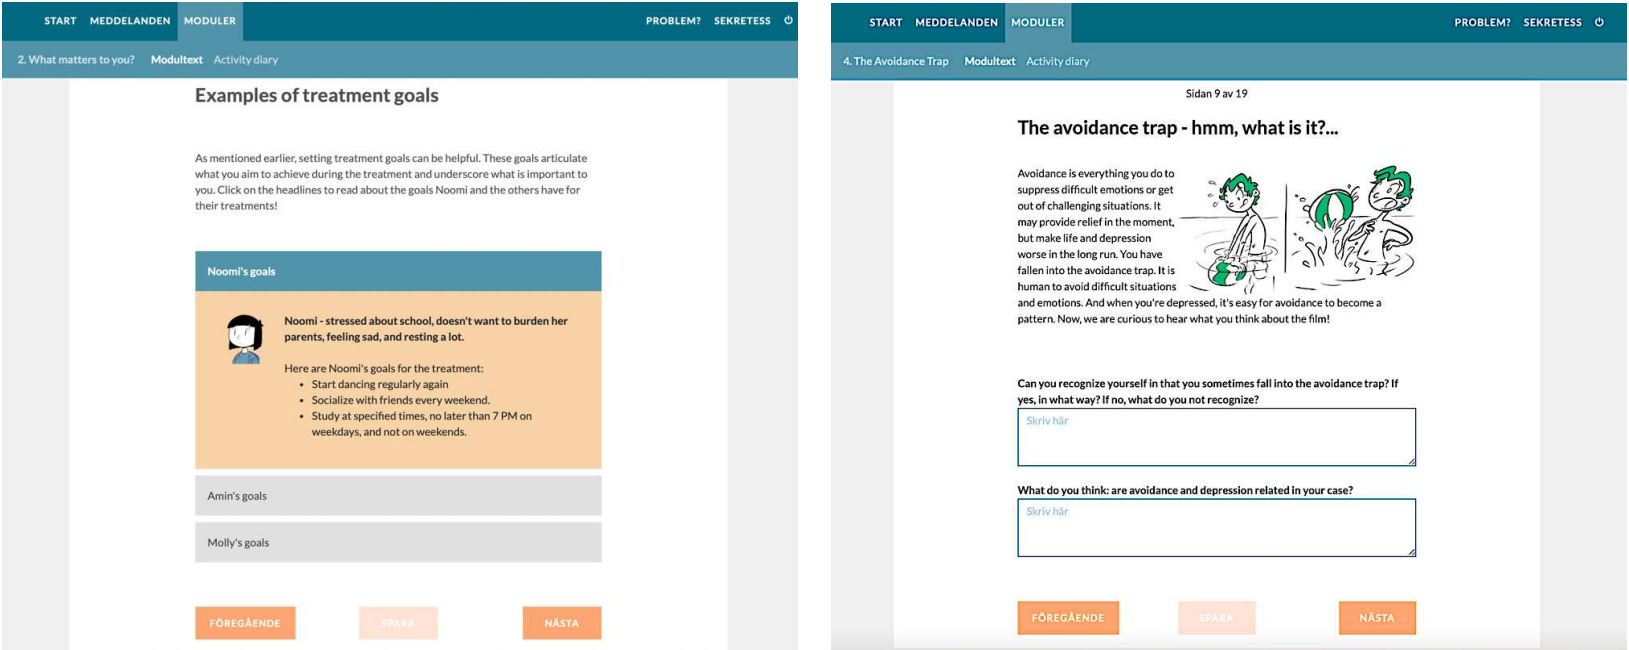

3. Left: Psychoeducation about common parent traps. Right: Information on validating one's adolescent's feelings.

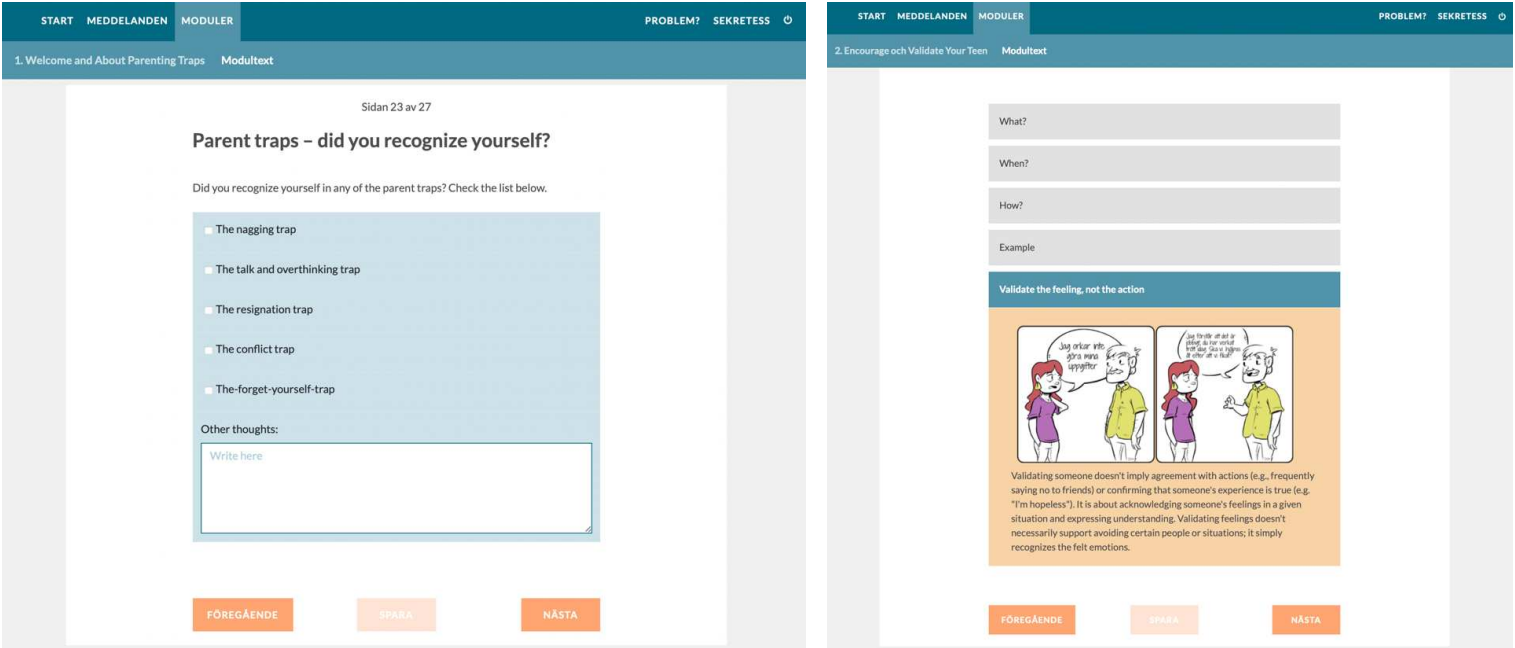

4. Guided I-BA includes an encrypted messaging feature. Psychologist will respond within 1-2 working days. Example below with a fictitious patient.

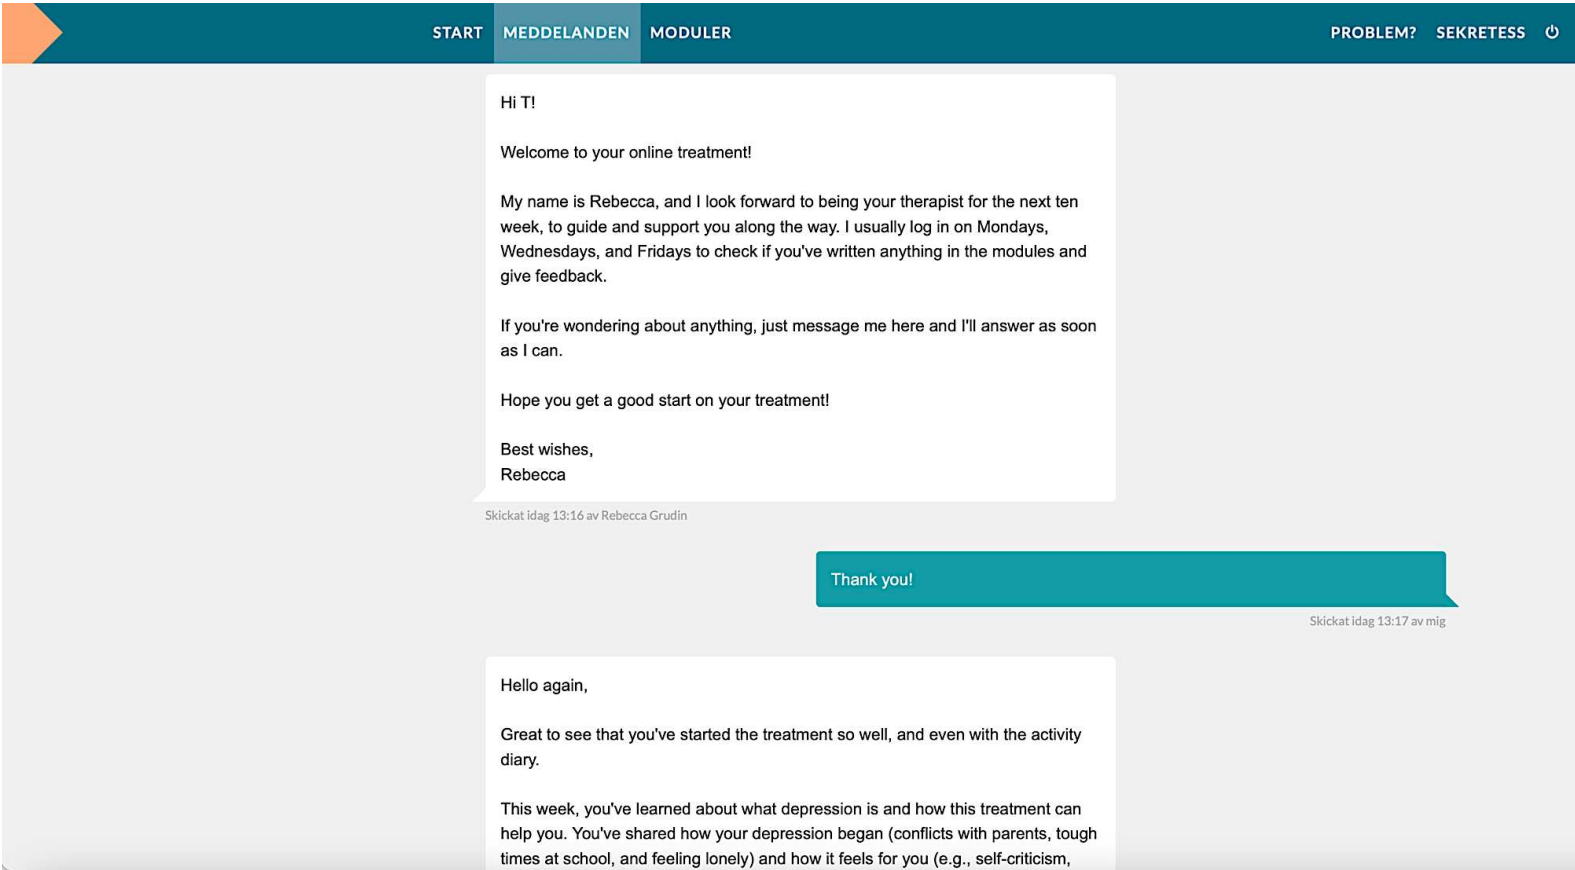

Supplement: inline-supplementary-material-2 [file inline-supplementary-material-2.pdf]
